# Supplementary material for: Targeted metabolomics of nonhuman primate serum after exposure to ionizing radiation: potential tools for high-throughput biodosimetry
Source: Royal Society of Chemistry journal article supplement (doi:10.1039/c6ra07757a), 2016-01-01
Supplement: c6ra07757a1.pdf [file c6ra07757a1.pdf]

**Supplementary Table 1.** PC and ePC molecules that exhibited significantly lowered concentrations after IR exposure (Mean concentration  $\pm$  standard error of the mean; Kruskal-Wallis test,  $P < 0.05$ ; bold indicates significantly lower than the control).

| Compound   | 0 Gy              | 2 Gy                                | 4 Gy                               | 6 Gy                                | 8 Gy                                | 10 Gy                               | <i>P</i> -value | <i>H</i> -value |
|------------|-------------------|-------------------------------------|------------------------------------|-------------------------------------|-------------------------------------|-------------------------------------|-----------------|-----------------|
| PC (28:1)  | 0.69 $\pm$ 0.05   | <b>0.50 <math>\pm</math> 0.03</b>   | <b>0.50 <math>\pm</math> 0.03</b>  | <b>0.47 <math>\pm</math> 0.03</b>   | <b>0.49 <math>\pm</math> 0.02</b>   | <b>0.47 <math>\pm</math> 0.05</b>   | 0.006           | 16.4            |
| PC (30:0)  | 1.28 $\pm$ 0.10   | 1.10 $\pm$ 0.05                     | <b>1.01 <math>\pm</math> 0.07</b>  | <b>0.97 <math>\pm</math> 0.06</b>   | <b>0.96 <math>\pm</math> 0.05</b>   | <b>0.83 <math>\pm</math> 0.05</b>   | 0.003           | 18.4            |
| PC (32:3)  | 0.24 $\pm$ 0.01   | 0.21 $\pm$ 0.01                     | <b>0.20 <math>\pm</math> 0.01</b>  | <b>0.20 <math>\pm</math> 0.01</b>   | <b>0.21 <math>\pm</math> 0.01</b>   | <b>0.17 <math>\pm</math> 0.01</b>   | 0.010           | 15.0            |
| PC (34:3)  | 11.00 $\pm$ 1.19  | 9.38 $\pm$ 0.85                     | 8.75 $\pm$ 0.79                    | 9.47 $\pm$ 0.70                     | 9.42 $\pm$ 0.94                     | <b>5.43 <math>\pm</math> 0.49</b>   | 0.002           | 19.2            |
| PC (34:4)  | 0.92 $\pm$ 0.06   | <b>0.73 <math>\pm</math> 0.05</b>   | <b>0.69 <math>\pm</math> 0.05</b>  | <b>0.74 <math>\pm</math> 0.03</b>   | <b>0.76 <math>\pm</math> 0.06</b>   | <b>0.51 <math>\pm</math> 0.04</b>   | 0.001           | 21.9            |
| PC (36:1)  | 47.45 $\pm$ 2.72  | <b>38.13 <math>\pm</math> 4.18</b>  | <b>33.53 <math>\pm</math> 2.94</b> | <b>28.74 <math>\pm</math> 2.72</b>  | <b>30.55 <math>\pm</math> 3.47</b>  | <b>21.68 <math>\pm</math> 1.97</b>  | <0.001          | 25.2            |
| PC (36:2)  | 185.83 $\pm$ 7.91 | <b>165.42 <math>\pm</math> 4.35</b> | 169.58 $\pm$ 5.58                  | <b>157.25 <math>\pm</math> 3.96</b> | <b>164.83 <math>\pm</math> 7.13</b> | <b>149.55 <math>\pm</math> 8.97</b> | 0.042           | 11.5            |
| PC (36:3)  | 97.62 $\pm$ 8.58  | <b>67.66 <math>\pm</math> 4.42</b>  | <b>65.40 <math>\pm</math> 4.56</b> | <b>61.70 <math>\pm</math> 3.74</b>  | <b>61.14 <math>\pm</math> 4.08</b>  | <b>49.36 <math>\pm</math> 3.98</b>  | <0.001          | 25.7            |
| PC (36:5)  | 14.73 $\pm$ 0.93  | <b>10.78 <math>\pm</math> 0.84</b>  | <b>9.94 <math>\pm</math> 0.67</b>  | <b>9.73 <math>\pm</math> 0.43</b>   | <b>10.16 <math>\pm</math> 0.62</b>  | <b>11.72 <math>\pm</math> 1.76</b>  | 0.005           | 16.7            |
| PC (36:6)  | 0.67 $\pm$ 0.05   | <b>0.50 <math>\pm</math> 0.03</b>   | <b>0.48 <math>\pm</math> 0.03</b>  | <b>0.51 <math>\pm</math> 0.02</b>   | <b>0.53 <math>\pm</math> 0.04</b>   | <b>0.45 <math>\pm</math> 0.03</b>   | 0.019           | 13.5            |
| PC (38:3)  | 47.47 $\pm$ 3.56  | <b>30.98 <math>\pm</math> 2.32</b>  | <b>26.43 <math>\pm</math> 2.17</b> | <b>24.01 <math>\pm</math> 1.91</b>  | <b>24.54 <math>\pm</math> 1.45</b>  | <b>25.96 <math>\pm</math> 2.04</b>  | <0.001          | 28.0            |
| PC (40:3)  | 0.83 $\pm$ 0.05   | <b>0.63 <math>\pm</math> 0.03</b>   | <b>0.58 <math>\pm</math> 0.02</b>  | <b>0.57 <math>\pm</math> 0.03</b>   | <b>0.59 <math>\pm</math> 0.02</b>   | <b>0.65 <math>\pm</math> 0.06</b>   | 0.003           | 17.7            |
| PC (40:4)  | 4.58 $\pm$ 0.31   | <b>3.12 <math>\pm</math> 0.18</b>   | <b>2.64 <math>\pm</math> 0.13</b>  | <b>2.54 <math>\pm</math> 0.16</b>   | <b>2.61 <math>\pm</math> 0.13</b>   | <b>2.85 <math>\pm</math> 0.18</b>   | <0.001          | 30.3            |
| PC (40:5)  | 18.18 $\pm$ 1.18  | <b>12.02 <math>\pm</math> 0.55</b>  | <b>11.93 <math>\pm</math> 0.52</b> | <b>11.00 <math>\pm</math> 0.85</b>  | <b>11.81 <math>\pm</math> 0.66</b>  | <b>13.93 <math>\pm</math> 1.19</b>  | 0.001           | 21.9            |
| PC (42:5)  | 1.46 $\pm$ 0.14   | <b>0.88 <math>\pm</math> 0.03</b>   | <b>0.84 <math>\pm</math> 0.06</b>  | <b>0.80 <math>\pm</math> 0.05</b>   | <b>0.77 <math>\pm</math> 0.04</b>   | <b>0.68 <math>\pm</math> 0.04</b>   | <0.001          | 27.0            |
| PC (42:6)  | 1.00 $\pm$ 0.10   | <b>0.69 <math>\pm</math> 0.03</b>   | <b>0.60 <math>\pm</math> 0.04</b>  | <b>0.57 <math>\pm</math> 0.03</b>   | <b>0.54 <math>\pm</math> 0.02</b>   | <b>0.48 <math>\pm</math> 0.03</b>   | <0.001          | 30.8            |
| ePC (30:0) | 0.26 $\pm$ 0.01   | <b>0.20 <math>\pm</math> 0.01</b>   | <b>0.19 <math>\pm</math> 0.01</b>  | <b>0.18 <math>\pm</math> 0.01</b>   | <b>0.19 <math>\pm</math> 0.01</b>   | <b>0.18 <math>\pm</math> 0.01</b>   | 0.001           | 21.5            |
| ePC (32:1) | 1.86 $\pm$ 0.13   | <b>1.60 <math>\pm</math> 0.08</b>   | <b>1.37 <math>\pm</math> 0.07</b>  | <b>1.51 <math>\pm</math> 0.10</b>   | <b>1.55 <math>\pm</math> 0.08</b>   | <b>1.52 <math>\pm</math> 0.06</b>   | 0.040           | 11.6            |
| ePC (32:2) | 0.65 $\pm$ 0.05   | 0.62 $\pm$ 0.03                     | 0.56 $\pm$ 0.03                    | 0.57 $\pm$ 0.04                     | 0.57 $\pm$ 0.02                     | <b>0.42 <math>\pm</math> 0.02</b>   | <0.001          | 23.5            |
| ePC (34:2) | 9.39 $\pm$ 0.68   | 9.25 $\pm$ 0.60                     | 8.32 $\pm$ 0.53                    | 8.16 $\pm$ 0.52                     | 8.04 $\pm$ 0.49                     | <b>5.26 <math>\pm</math> 0.28</b>   | <0.001          | 25.9            |
| ePC (36:2) | 19.94 $\pm$ 1.31  | 17.38 $\pm$ 1.02                    | <b>15.86 <math>\pm</math> 0.98</b> | <b>13.91 <math>\pm</math> 0.88</b>  | <b>13.85 <math>\pm</math> 0.99</b>  | <b>10.73 <math>\pm</math> 0.68</b>  | <0.001          | 30.7            |
| ePC (36:3) | 6.23 $\pm$ 0.49   | 5.64 $\pm$ 0.33                     | <b>5.00 <math>\pm</math> 0.29</b>  | <b>5.02 <math>\pm</math> 0.31</b>   | <b>4.93 <math>\pm</math> 0.27</b>   | <b>3.38 <math>\pm</math> 0.18</b>   | <0.001          | 28.2            |
| ePC (38:2) | 3.95 $\pm$ 0.29   | 3.58 $\pm$ 0.23                     | 3.32 $\pm$ 0.19                    | <b>2.87 <math>\pm</math> 0.23</b>   | <b>2.69 <math>\pm</math> 0.19</b>   | <b>1.95 <math>\pm</math> 0.15</b>   | <0.001          | 29.8            |
| ePC (38:3) | 6.48 $\pm$ 0.39   | <b>4.68 <math>\pm</math> 0.27</b>   | <b>4.17 <math>\pm</math> 0.28</b>  | <b>4.05 <math>\pm</math> 0.23</b>   | <b>4.15 <math>\pm</math> 0.22</b>   | <b>4.42 <math>\pm</math> 0.38</b>   | 0.001           | 21.0            |

**Supplementary Table 2.** PC and ePC molecules that significantly changed in concentration after IR exposure, but increased at 10 Gy dose (Mean concentration  $\pm$  standard error of the mean; Kruskal-Wallis test,  $P < 0.05$ ; bold indicates significantly different than control; \* indicates higher than control).

| Compound   | 0 Gy              | 2 Gy                               | 4 Gy                               | 6 Gy                               | 8 Gy                               | 10 Gy                                | <i>P</i> -value | <i>H</i> -value |
|------------|-------------------|------------------------------------|------------------------------------|------------------------------------|------------------------------------|--------------------------------------|-----------------|-----------------|
| PC (36:4)  | 129.88 $\pm$ 8.11 | <b>94.18 <math>\pm</math> 5.54</b> | <b>85.93 <math>\pm</math> 4.54</b> | <b>90.82 <math>\pm</math> 4.47</b> | <b>96.04 <math>\pm</math> 4.64</b> | 128.30 $\pm$ 9.25                    | <0.001          | 27.0            |
| PC (38:4)  | 114.16 $\pm$ 8.82 | <b>73.84 <math>\pm</math> 3.66</b> | <b>70.41 <math>\pm</math> 4.10</b> | <b>72.38 <math>\pm</math> 5.32</b> | <b>78.51 <math>\pm</math> 4.76</b> | 106.26 $\pm$ 7.39                    | <0.001          | 28.9            |
| PC (38:5)  | 48.11 $\pm$ 3.78  | <b>33.02 <math>\pm</math> 1.83</b> | <b>31.58 <math>\pm</math> 1.61</b> | <b>31.03 <math>\pm</math> 1.59</b> | <b>32.64 <math>\pm</math> 1.52</b> | 44.54 $\pm$ 4.20                     | <0.001          | 21.2            |
| PC (38:6)  | 92.12 $\pm$ 7.57  | <b>65.81 <math>\pm</math> 3.80</b> | <b>63.05 <math>\pm</math> 2.38</b> | <b>67.23 <math>\pm</math> 4.25</b> | <b>72.52 <math>\pm</math> 5.09</b> | <b>118.06 <math>\pm</math> 8.12*</b> | <0.001          | 29.4            |
| PC (40:6)  | 55.77 $\pm$ 4.66  | <b>40.33 <math>\pm</math> 1.89</b> | <b>39.88 <math>\pm</math> 1.58</b> | <b>38.15 <math>\pm</math> 3.41</b> | <b>41.00 <math>\pm</math> 2.45</b> | 51.77 $\pm$ 3.56                     | 0.007           | 16.0            |
| PC (42:4)  | 0.32 $\pm$ 0.02   | <b>0.25 <math>\pm</math> 0.01</b>  | <b>0.22 <math>\pm</math> 0.01</b>  | <b>0.23 <math>\pm</math> 0.01</b>  | <b>0.24 <math>\pm</math> 0.01</b>  | 0.30 $\pm$ 0.03                      | 0.016           | 14.0            |
| ePC (38:4) | 14.35 $\pm$ 1.14  | <b>11.43 <math>\pm</math> 0.50</b> | <b>9.69 <math>\pm</math> 0.43</b>  | <b>10.31 <math>\pm</math> 0.74</b> | <b>11.36 <math>\pm</math> 0.55</b> | 12.69 $\pm$ 0.79                     | 0.003           | 18.4            |
| ePC (38:5) | 14.83 $\pm$ 1.26  | <b>11.94 <math>\pm</math> 0.51</b> | <b>10.12 <math>\pm</math> 0.39</b> | <b>11.13 <math>\pm</math> 0.71</b> | <b>11.87 <math>\pm</math> 0.63</b> | 13.06 $\pm$ 0.97                     | 0.009           | 15.3            |
| ePC (40:3) | 1.27 $\pm$ 0.08   | 1.07 $\pm$ 0.05                    | 0.98 $\pm$ 0.05                    | 1.04 $\pm$ 0.08                    | 1.16 $\pm$ 0.09                    | <b>1.70 <math>\pm</math> 0.25*</b>   | 0.006           | 16.3            |
| ePC (40:4) | 3.33 $\pm$ 0.27   | <b>2.84 <math>\pm</math> 0.12</b>  | <b>2.56 <math>\pm</math> 0.10</b>  | <b>2.81 <math>\pm</math> 0.15</b>  | <b>3.04 <math>\pm</math> 0.15</b>  | 3.66 $\pm$ 0.26                      | 0.003           | 18.3            |
| ePC (40:5) | 6.60 $\pm$ 0.53   | 5.67 $\pm$ 0.24                    | <b>5.18 <math>\pm</math> 0.14</b>  | 5.81 $\pm$ 0.30                    | 6.39 $\pm$ 0.34                    | <b>8.55 <math>\pm</math> 0.72*</b>   | <0.001          | 24.6            |
| ePC (40:6) | 9.61 $\pm$ 0.88   | <b>7.82 <math>\pm</math> 0.37</b>  | <b>7.13 <math>\pm</math> 0.27</b>  | <b>7.57 <math>\pm</math> 0.57</b>  | <b>8.18 <math>\pm</math> 0.45</b>  | 10.19 $\pm$ 0.73                     | 0.008           | 15.6            |

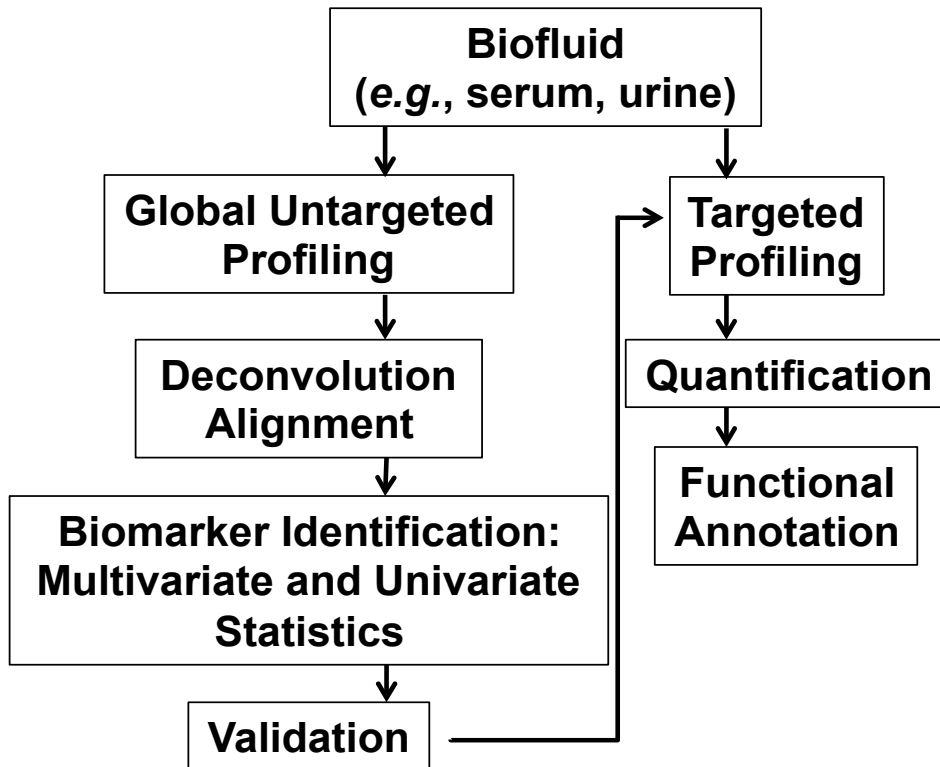

Supplementary Fig. 1 Untargeted and targeted workflows for metabolomics. (adapted from <sup>29</sup>)
